# Supplementary material for: Development of a CRISPR-Cas12a rapid diagnostic for human cytomegalovirus
Source: PubMed Central journal article supplement — Antiviral Res. Author manuscript; Available in PMC 2023 Jul 1. (PMC10280810; doi:10.1016/j.antiviral.2023.105624), 2023-05-05
Supplement: NIHMS1901484-supplement-supplemental_figure_1.pdf [file NIHMS1901484-supplement-supplemental_figure_1.pdf]

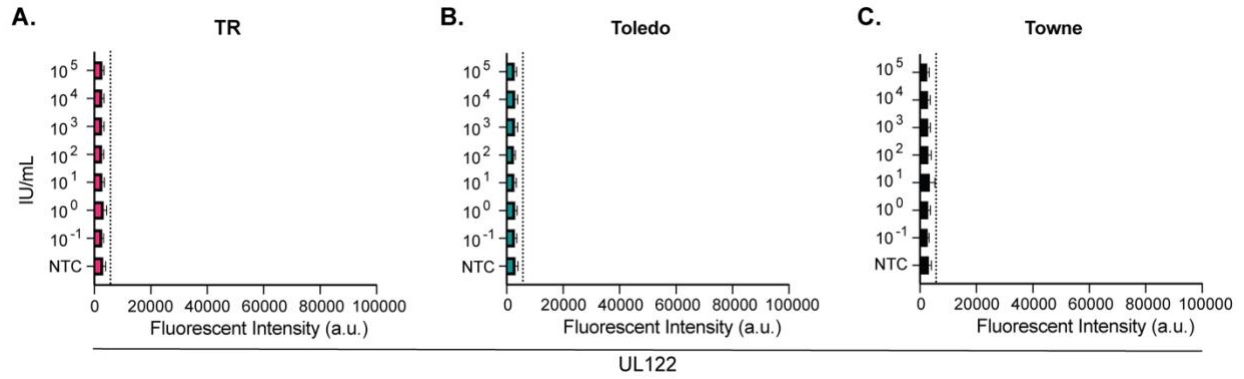

**Supplemental Figure 1. Limit of Detection of CMV UL122 using a CRISPR-Cas12a assay.** The CMV strains TR, Toledo and Towne were serially diluted (IU/mL) into nuclease free water, prior to DNA extraction and PCR amplification. Resultant samples were assayed using a CRISPR-Cas12a based fluorescence detection assay. The limit of detection of the CMV gene UL122 using the CMV strain A) TR, B) Toledo, or C) Towne. Positive is calculated by the mean of the NTC + (3\*SD) and is indicated by the dotted line. NTC= no template control. a.u. = arbitrary units. IU = infectious units.
